# Supplementary material for: Ultrafine Pt nanoparticle decoration with CoP as highly active electrocatalyst for alcohol oxidation
Source: Royal Society of Chemistry journal article supplement (doi:10.1039/c6ra21938a), 2016-01-01
Supplement: c6ra21938a1.pdf [file c6ra21938a1.pdf]

## Supporting Information

### **Ultrafine Pt nanoparticle decoration with CoP as highly active electrocatalyst for alcohols oxidation**

Xin Xiao,<sup>a</sup> Dekang Huang,<sup>b</sup> Yanping Luo,<sup>a</sup> Man Li,<sup>a</sup> Mingkui Wang,<sup>a</sup> Yan Shen<sup>\*a</sup>

<sup>a</sup> Wuhan National Laboratory for Optoelectronics, Huazhong University of Science and Technology, Luoyu Road 1037, Wuhan 430074, P. R. China.

<sup>b</sup> College of Science, Huazhong Agricultural University, Wuhan 430070, P. R. China

\*Corresponding author. E-mail: [ciac\\_sheny@mail.hust.edu.cn](mailto:ciac_sheny@mail.hust.edu.cn) (Y. Shen);

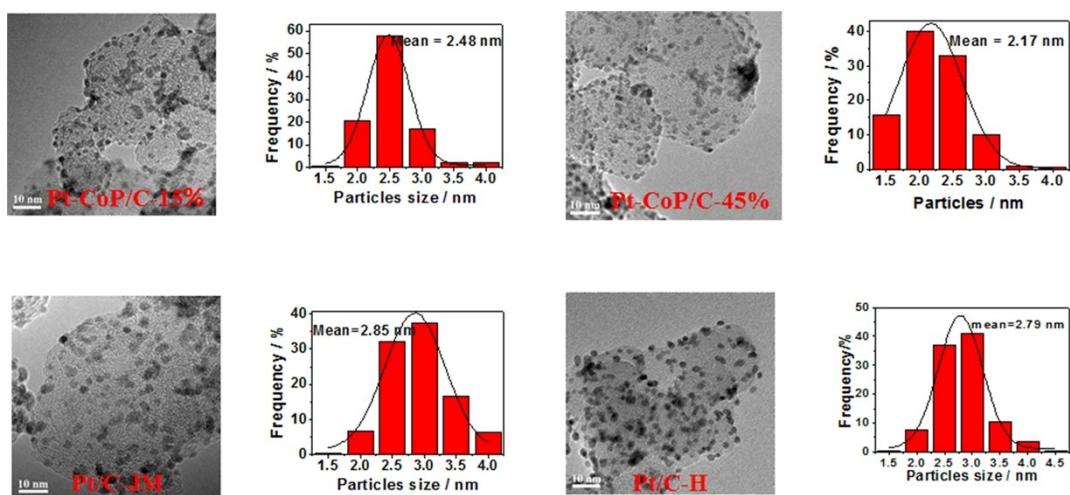

**Fig. S1** TEM images and corresponding particle size distribution histograms of Pt-CoP/C-X% (X=15, 45), Pt/C-JM and Pt/C-H catalysts.

The software of 'Image J' was firstly applied to measure more than 200 randomly selected Pt nanoparticles from the TEM image. Then a particle size distribution histogram of Pt nanoparticles can be obtained through data processing by using Origin.

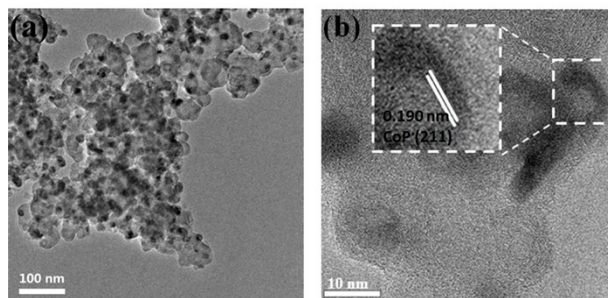

**Fig. S2** (a) and (b) shows the TEM images of CoP/C at different magnification.

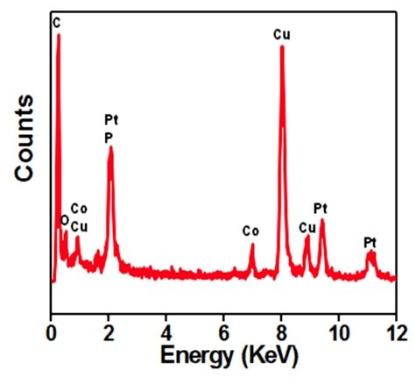

**Fig. S3** EDX pattern of Pt-CoP/C-30% catalyst

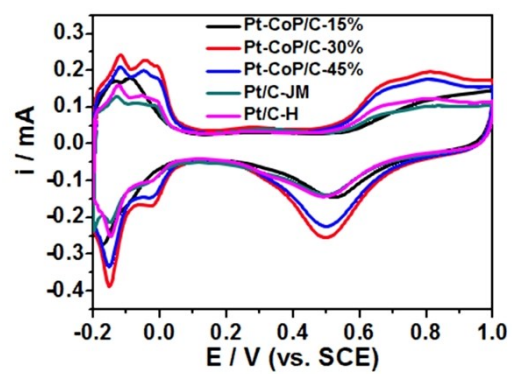

**Fig. S4** Cyclic voltammograms of the Pt-CoP/C-X% (X=15, 30, 45), Pt/C-JM and Pt/C-H catalysts in 0.5 M H<sub>2</sub>SO<sub>4</sub> at the scan rate of 50 mV s<sup>-1</sup>.

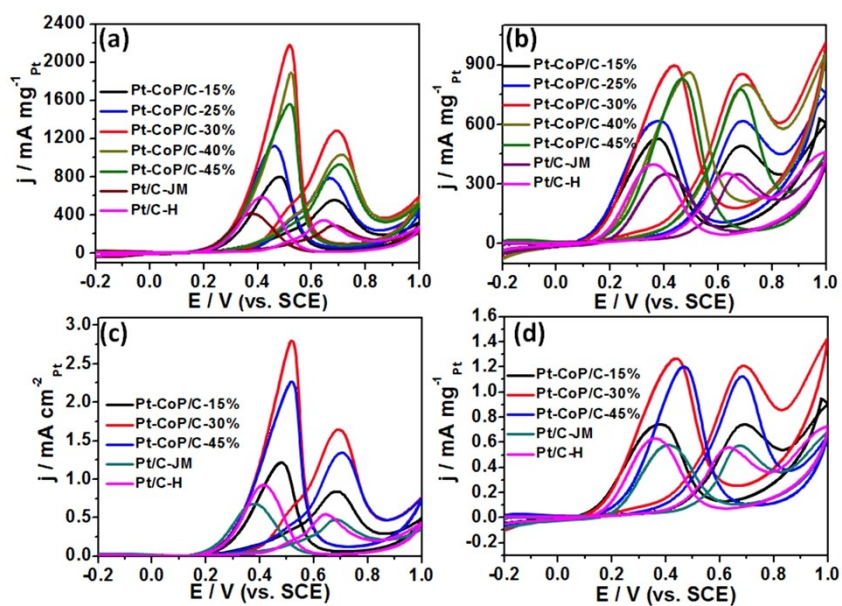

**Fig. S5** (a) and (c) shows the mass activity and specific activity of Pt-CoP/C-X% (X=15, 25, 30, 40, 45), Pt/C-JM, and Pt/C-H catalysts in 0.5 M H<sub>2</sub>SO<sub>4</sub> + 1 M CH<sub>3</sub>OH; (b) and (d) shows the mass activity and specific activity of Pt-CoP/C-X% (X=15, 30, 45), Pt/C-JM, and Pt/C-H catalysts in 0.5 M H<sub>2</sub>SO<sub>4</sub> + 1 M CH<sub>3</sub>CH<sub>2</sub>OH.

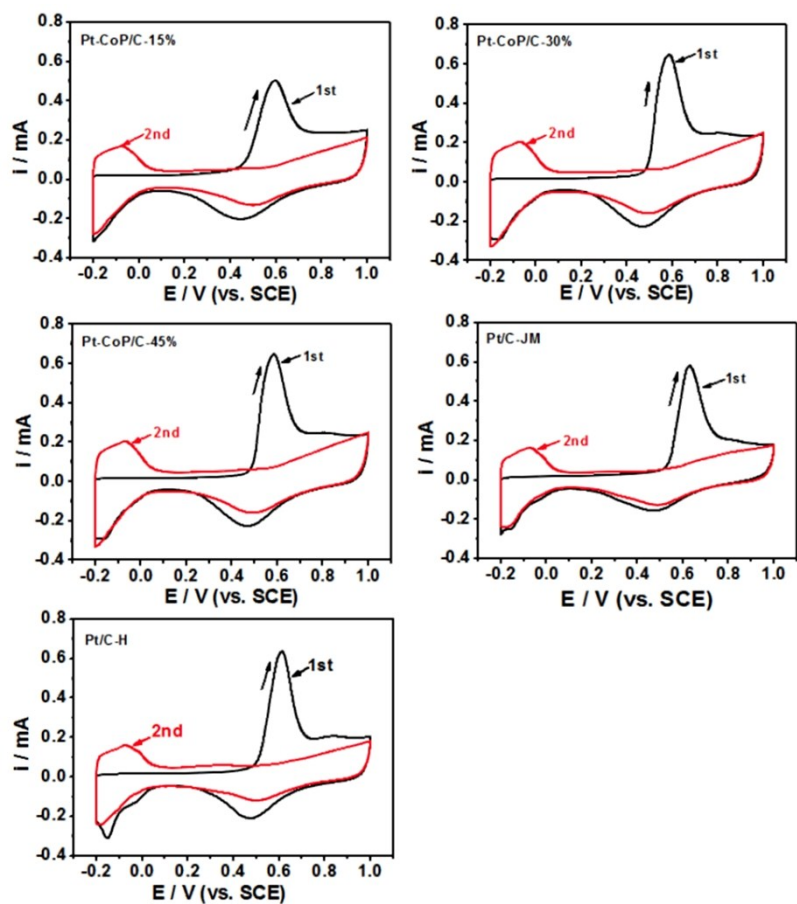

**Fig. S6** CO-stripping voltammograms of Pt-CoP/C-X% (X=15, 30, 45), Pt/C-JM and Pt/C-H catalysts in 0.5 M H<sub>2</sub>SO<sub>4</sub>.

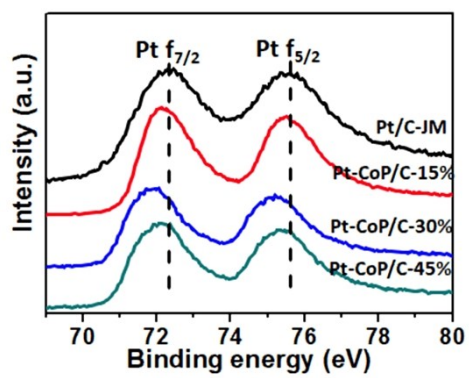

**Fig. S7** XPS survey spectra of the Pt4f for the as-prepared catalysts.



**Table S1** the data of EDX for the Pt-CoP/C-30%.

| <b>Elements</b> | <b>Wt%</b> |
|-----------------|------------|
| C K             | 59.40      |
| Co K            | 14.28      |
| P K             | 5.93       |
| O K             | 3.11       |
| Pt K            | 17.28      |
| Total           | 100        |

**Table S2** The comparison of mass and specific peak current densities of different Pt-based catalysts for MOR.

| Catalysts              | Mass Activity (mA mg <sup>-1</sup> <sub>Pt</sub> ) | Specific Activity (mA cm <sup>-2</sup> <sub>Pt</sub> ) | Ref       |
|------------------------|----------------------------------------------------|--------------------------------------------------------|-----------|
| PtNiP/C                | 362                                                | 0.8                                                    | 22        |
| Pt-Ni-P                | 360                                                | 0.65                                                   | 23        |
| Pt-Co <sub>2</sub> P/C | 1236                                               | 1.81                                                   | 26        |
| Pt-CoP/C-30%           | 1300                                               | 1.67                                                   | This work |

**Table S3** The comparison of mass and specific peak current densities of different Pt-based catalysts for EOR.

| Catalysts    | Mass Activity (mA mg <sup>-1</sup> <sub>Pt</sub> ) | Specific Activity (mA cm <sup>-2</sup> <sub>Pt</sub> ) | Ref       |
|--------------|----------------------------------------------------|--------------------------------------------------------|-----------|
| PtNWs/C      | 278                                                | -                                                      | 9         |
| PtSn/XC-72   | 764.1                                              | -                                                      | 11        |
| Pt-NiO /C    | 637                                                | -                                                      | 13        |
| Pt-CoP/C-30% | 857                                                | 1.1                                                    | This work |

**Table S4** Electrochemical surface area (ECSA) estimated from CO stripping experiment and the peak potential for CO stripping.

| Catalysts    | ECSA <sub>CO</sub> (m <sup>2</sup> g <sup>-1</sup> ) | Peak Potential (V vs. SCE) |
|--------------|------------------------------------------------------|----------------------------|
| Pt/C-JM      | 60.80                                                | 0.629                      |
| Pt/C-H       | 63.35                                                | 0.612                      |
| Pt-CoP/C-15% | 65.99                                                | 0.594                      |
| Pt-CoP/C-30% | 77.80                                                | 0.584                      |
| Pt-CoP/C-45% | 68.92                                                | 0.595                      |
